# Supplementary material for: pulver: an R package for parallel ultra-rapid p-value computation for linear regression interaction terms
Source: Springer Nature journal article supplement (doi:10.1186/s12859-017-1838-y), 2017-09-29
Supplement: 12859_2017_1838_MOESM1_ESM.pdf [file 12859_2017_1838_MOESM1_ESM.pdf]

## Theory underlying *pulver*

A general linear regression model is given as

$$y = X\beta + \epsilon, \quad \epsilon \sim N(0, \sigma^2 I).$$

Here  $y^T = (y_1, y_2, \dots, y_n)$  is an  $n \times 1$  vector, the dependent variable.  $X$  represents the  $n \times (p + 1)$  covariate matrix with corresponding  $\beta^T = (\beta_0, \beta_1, \dots, \beta_p)$  a  $(p + 1) \times 1$  vector of unknown regression coefficients. The  $n \times 1$  vector  $\epsilon$  serves as error term has variance  $\sigma^2$ , and  $\epsilon_1, \dots, \epsilon_n$  are independent and identical distributed (i.i.d.).

Let  $X = \begin{pmatrix} 1 & x_1 & z_1 & w_1 = x_1 \cdot z_1 \\ 1 & x_2 & z_2 & w_2 = x_2 \cdot z_2 \\ \vdots & \vdots & \vdots & \vdots \\ 1 & x_n & z_n & w_n = x_n \cdot z_n \end{pmatrix}$ , and the unknown regression coefficients  $\beta^T = (\beta_0 \ \beta_1 \ \beta_2 \ \beta_3)$ . The then above general linear model reduces to the following linear regression model

$$y = \beta_0 + \beta_1 x + \beta_2 z + \beta_3 w + \epsilon, \quad \epsilon \sim N(0, \sigma^2),$$

with  $\epsilon_1, \dots, \epsilon_n$  being independent and identical distributed (*i. i. d.*).

We want to test the null-hypothesis that  $\beta_3 = 0$  against the alternative hypothesis that  $\beta_3 \neq 0$ , where  $\beta_3$  is the regression coefficient of  $w$ . In order to eliminate the intercept  $\beta_0$ , we center all variables, such that  $\sum_i y_i = \sum_i x_i = \sum_i z_i = \sum_i w_i = 0$ , to obtain the following simplified regression model:

$$y = \beta_1 x + \beta_2 z + \beta_3 w + \epsilon, \quad \epsilon \sim N(0, \sigma^2) \text{ i. i. d.}$$

(For simplicity, we retain the notations from above for the simplified model (for variable names  $y, x, z$ , and  $w$  for the centered variables, regression coefficients, error term))

The vectors  $x, z$  and  $w$  span a subspace  $S$  of  $\mathbb{R}^n$ . The ordinary least-squares (OLS) estimates of  $\hat{\beta}$  are found by minimizing the residual sum of squares over  $y - X\beta$ :

$$\hat{\beta} = \arg \min_{\beta} (y - X\beta)^T (y - X\beta).$$

Geometrically, this means that  $\hat{\beta}_1, \hat{\beta}_2$ , and  $\hat{\beta}_3$  must be selected such that

$$y' = \hat{\beta}_1 x + \hat{\beta}_2 z + \hat{\beta}_3 w \quad (1)$$

is the orthogonal projection of  $y$  onto  $S$ , the subspace spanned by  $w, x$ , and  $z$ . It can be shown that if  $x, y$ , and  $z$  form an orthogonal basis of  $S$ , the coefficients of the orthogonal projection  $y'$  of  $y$  onto  $S$  are given by

$$\hat{\beta}_1 = \frac{\langle y, x \rangle}{\langle x, x \rangle}, \hat{\beta}_2 = \frac{\langle y, z \rangle}{\langle z, z \rangle}, \hat{\beta}_3 = \frac{\langle y, w \rangle}{\langle w, w \rangle} \quad [1].$$

Unlike the usual formula for computing OLS coefficient estimates ( $\hat{\beta} = (X^T X)^{-1} X^T y$ ), this formula does not involve an expensive matrix inversion, but instead is easy and fast to compute.

In general,  $w$ ,  $x$ , and  $z$  do not form an orthogonal basis, so we proceed as follows.

1. Create an orthogonal basis  $v_1, v_2$ , and  $v_3$  for  $S$  based on  $x, z$ , and  $w$ , respectively.
2. Compute  $y'$ , the orthogonal projection of  $y$  onto  $S$ , using the orthogonal basis created in step 1.
3. Deduce the estimate of the regression coefficient for  $w$  from the regression coefficients for  $y'$ .
4. Compute the Student's  $t$ -test statistic to test  $\beta_3 = 0$  as a function of the correlation coefficient  $r$  between  $y'$  and  $\beta_3 v_3$ .

## 1. Create an orthogonal basis for S

Let

$$v_1 = x,$$

$$v_2 = z - \text{proj}(z, v_1), \text{ and}$$

$$v_3 = w - \text{proj}(w, v_1) - \text{proj}(w, v_2),$$

where

$$\text{proj}(a, b) = \frac{\langle a, b \rangle}{\langle b, b \rangle} b$$

is the orthogonal projection of  $a$  onto  $b$ . The vectors  $v_1, v_2$  and  $v_3$  form an orthogonal basis of  $S$ . By construction, we clearly observe that  $v_1$  is dependent on  $x$  only,  $v_2$  is dependent on  $z$  and  $x$  and  $v_3$  depends on  $x, z$ , and  $w$ .

## 2. Orthogonally project $y$ onto S

The orthogonal projection  $y'$  of  $y$  onto  $S$  has the form

$$y' = \beta'_1 v_1 + \beta'_2 v_2 + \beta'_3 v_3 \quad (2)$$

where

$$\beta'_i = \frac{\langle y, v_i \rangle}{\langle v_i, v_i \rangle} \quad (i = 1, 2, 3),$$

with  $\|a\| = \sqrt{\langle a, a \rangle}$ ,

and  $\langle a, b \rangle = \sum_{i=1}^n a_i b_i$  being the inner product of vectors  $a$  and  $b$  in  $\mathbb{R}^n$ .

### 3. Deduce the estimate of $w$ 's regression coefficient

We want to estimate the regression coefficient  $\beta_3$  of the vector  $w$  given in Equation 1 using Equation 2. The vector  $w$  occurs in  $v_3$  but not in  $v_1$  or  $v_2$ . This allows us to write  $y'$  as

$$\begin{aligned}
 y' &= \beta'_1 v_1 + \beta'_2 v_2 + \beta'_3 v_3 \\
 &= \beta'_1 v_1 + \beta'_2 v_2 + \beta'_3 (w - \text{proj}(w, v_1) - \text{proj}(w, v_2)) \\
 &= \beta'_1 v_1 + \beta'_2 v_2 + \beta'_3 w - \beta'_3 \text{proj}(w, v_1) - \beta'_3 \text{proj}(w, v_2) \\
 &= \beta'_3 w + \beta'_1 v_1 + \beta'_2 v_2 - \beta'_3 \text{proj}(w, v_1) - \beta'_3 \text{proj}(w, v_2) \\
 &= \beta'_3 w + \beta'_1 v_1 + \beta'_2 v_2 - \underbrace{\beta'_3 \frac{\langle w, v_1 \rangle}{\langle v_1, v_1 \rangle}}_{\text{scalar}} v_1 - \underbrace{\beta'_3 \frac{\langle w, v_2 \rangle}{\langle v_2, v_2 \rangle}}_{\text{scalar}} v_2 \\
 &= \beta'_3 w + c \left( \begin{array}{c} \underbrace{v_1}_{c(x)} , \underbrace{v_2}_{c(x,z)} \end{array} \right) \\
 &= \beta'_3 w + c(x, z)
 \end{aligned}$$

where  $c(\dots)$  represents a linear combination of  $x$  or  $x$  and  $z$ , accordingly. This allows us to identify  $\beta_3$ , and we estimate the regression coefficient of  $w$  in Equation (1):

$$\beta_3 = \beta'_3 = \frac{\langle y, v_3 \rangle}{\langle v_3, v_3 \rangle}.$$

### 4. Compute the Student's $t$ -test statistic to test $\beta_3 = 0$ as a function of the correlation coefficient $r$ between $y'$ and $\beta_3 v_3$ .

We want to show that the Student's  $t$ -test statistic usually used to test for  $\beta_3 = 0$  in a linear regression model, with  $t \geq t^*$  for significant threshold  $t^*$  can be computed using the Pearson's correlation coefficient  $r$ . The Pearson's correlation coefficient  $r$  between  $y'$  and  $v_3$  (both centered) is computed as follows:

$$r = \frac{\sum_{i=1}^N y_i' v_{3i}}{\|y'\| \|v_3\|} = \frac{\sum_{i=1}^N y_i' v_{3i}}{\sqrt{\sum_{i=1}^N y_i'^2} \sqrt{\sum_{i=1}^N v_{3i}^2}}.$$

It then has to hold that  $r \geq t^* \cdot \sqrt{\frac{1}{DF+t^{*2}}}$  if we want to reject the null-hypothesis.

The fact that  $v_1, v_2$ , and  $v_3$  are orthogonal means that  $\beta_3$  is actually the OLS estimate of the regression coefficient  $r$  in the simple linear regression

$$y' = \beta_3 v_3 + \epsilon, \quad \epsilon \sim N(0, \sigma^2) \text{ i. i. d} \quad (3)$$

The Student's  $t$ -statistic to test for coefficient  $\beta_3 = 0$  is given by

$$t = \frac{\beta_3}{se(\beta_3)}$$

and it has a Student's  $t$  distribution with  $DF = n - 4$  degrees of freedom. Subtracting 4 results from the number of regression coefficients in the initial model and the estimated variance of  $\epsilon$ :  $\hat{\beta}_1, \hat{\beta}_2, \hat{\beta}_3, s^2$ .

From the theory of simple linear regression, we know the following relationships (e.g., see Snedecor and Cochran 1967 [2], chapter 7.3, p. 175 ff.):

- a)  $\beta_3 = r \frac{se(y')}{se(v_3)}$
- b)  $se(\beta_3) = s / \sqrt{\sum_{i=1}^n v_{3i}^2}$
- c)  $s^2 = \frac{1-r^2}{DF} \sum_{i=1}^N y_i'^2$
- d)  $se(a) = \sqrt{\frac{1}{n-1} \sum_{i=1}^n a_i^2}$ , with vector  $a$  in  $\mathbb{R}^n$  and  $\sum_i a_i = 0$ ,

where  $\beta_3$  is the OLS estimate of Equation 3;  $se(y')$  and  $se(v_3)$  are the sample estimates of the standard deviations of  $y$  and  $v_3$ , respectively;  $se(\beta_3)$  is the estimate of the standard deviation of  $\beta_3$ ;  $s^2$  is the OLS estimate of  $\sigma^2$ , the variance of the error term  $\epsilon$ ;  $r$  is the Pearson's correlation coefficient of  $y$  and  $v_3$ ; and  $DF$  is the degree of freedom.

After plugging Equations a–d into the formula for the Student's  $t$ , we obtain the following:

$$\begin{aligned}
t &= \frac{\beta_3}{se(\beta_3)} \\
&= \frac{r \frac{se(y')}{se(v_3)}}{\frac{s}{\sqrt{\sum_{i=1}^N v_{3i}^2}}} \\
&= \frac{r se(y') \sqrt{\sum_{i=1}^N v_{3i}^2}}{se(v_3) \sqrt{\frac{(1-r^2)}{DF} \sum_{i=1}^N y_i'^2}} \\
&= \frac{r \sqrt{DF}}{\sqrt{(1-r^2)}} \cdot \frac{se(y') \sqrt{\sum_{i=1}^n v_{3i}^2}}{se(v_3) \sqrt{\sum_{i=1}^n y_i'^2}} \\
&= \frac{r \sqrt{DF}}{\sqrt{(1-r^2)}} \cdot \frac{\sqrt{\frac{1}{n-1} \sum_{i=1}^n y_i'^2} \sqrt{\sum_{i=1}^n v_{3i}^2}}{\sqrt{\frac{1}{n-1} \sum_{i=1}^n v_{3i}^2} \sqrt{\sum_{i=1}^n y_i'^2}} \\
&= \frac{r \sqrt{DF}}{\sqrt{(1-r^2)}}
\end{aligned}$$

1. Saville D, Wood GR, Statistical methods: The geometric approach. Springer Science & Business Media; 2012.
2. Snedecor, G. and W. Cochran, Statistical methods. 6th ed. Ames Iowa: University Press; 1967. p. 349-352.
